# Supplementary material for: Cardiovascular disease risk scores in identifying future frailty: the Whitehall II prospective cohort study
Source: HighWire-hosted journal article supplement (doi:10.1136/heartjnl-2012-302922), 2013-03-16
Supplement: heartjnl-2012-302922supp_appendix.pdf [file heartjnl-2012-302922supp_appendix.pdf]

## Web Appendix

### Outcomes at follow-up

#### *The Fried frailty measure (2007-9)*

Frailty was measured using the Fried frailty scale at the end of follow-up (phase 9, 2007-9). This measure comprises the following components (cut-offs for each component are based on that of Fried and colleagues).<sup>1</sup>

1. *Exhaustion*: defined using two items drawn from the Center for Epidemiology Studies-Depression (CES-D) scale:<sup>2</sup> “I felt that everything I did was an effort in the last week” and “I could not get going in the last week”. If participants answered “occasionally or moderate amount of the time (3-4 days)” or “most or all of the time (5-7 days)” to either of these items, they were categorized as exhausted.

2. *Physical activity*: based on a modified version of the Minnesota leisure-time physical activity questionnaire<sup>3</sup> which includes 20 items on the frequency and duration of participation in different physical activities (e.g., running, cycling, other sports, housework, and gardening activities). Total hours per week were calculated for each activity and a metabolic equivalent (MET) value was assigned to each based on a compendium of values.<sup>4</sup> Energy expenditure (kcal/week) was computed for each participant. Low levels of physical activity were denoted by an expenditure of <383 kcal/week (men) and 270 (women).

3. *Walking speed*: based on the duration of walking a distance of 8-foot (2.4 meters) at usual pace. Established cut-offs for this characteristic are based on results for a 15 feet (4.6 meters) walking test. Accordingly, participants were categorized as having slow walking speed when time to walk 8 feet was  $\geq 3.73$  seconds (for men with height  $\leq 173$  cm or women with height  $\leq 159$  cm) or  $\geq 3.20$  seconds (for men with height  $> 173$  cm or women with height  $> 159$  cm).

4. *Grip strength*: measured in kilograms using the Smedley hand grip dynamometer. Cut-offs were stratified by gender and body mass index (BMI). For men, low grip strength was denoted as:  $\leq 29$  kg

(BMI  $\leq 24$  kg/m<sup>2</sup>),  $\leq 30$  (BMI 24.1-28), and  $\leq 32$  (BMI  $> 28$ ). For women, low grip strength was:  $\leq 17$  (BMI  $\leq 23$ ),  $\leq 17.3$  (BMI 23.1-26),  $\leq 18$  (BMI 26.1-29), and  $\leq 21$  (BMI  $> 29$ ).

5. *Weight loss*: weight loss in the context of frailty has been defined as being either unintentional or as a proportion of body weight lost over the previous year. We used data from phases 7 and 9 to identify weight loss of greater than 10%, in accordance with that in the Women's Health Aging Study-I.<sup>5</sup>

A total frailty score was calculated by allocating a value of 1 to each of the above criteria if present, resulting in a range of 0 to 5. Participants were classified as "frail" if they had at least three out of five of the frailty components; as "pre-frail" if they had 1-2; and as "non-frail" if they had none of these components.<sup>1</sup>

### ***CVD outcomes (1997-9 to 2007-9)***

#### ***1. Non-fatal CHD events***

CHD diagnoses included ischemic heart diseases (international classification of diseases version 9 (ICD-9) codes 410–414 or ICD-10 codes I20–I25)<sup>6</sup> which included non-fatal myocardial infarction (MI), angina pectoris, and other forms of ischemic heart disease. Information on non-fatal MI and angina was obtained from several sources. From 1989 onwards the British National Health Service (NHS) Hospital Episode Statistics (HES)<sup>7</sup> database has provided reports of participants' diagnoses on discharge and procedure codes for all NHS hospitals in England and Wales. Participants also self-report CHD events in our health survey questionnaires. These are then validated using the study resting electrocardiograms, the HES database, and by contacting general practitioners for confirmation when no other external source exists.

#### ***2. Non-fatal stroke events***

Non-fatal stroke included first subarachnoid hemorrhage, intracerebral hemorrhage, cerebral infarction, and not specified stroke (ICD-10 codes I60 – I64), and transient cerebral ischemic attacks (ICD-10 codes G45). The cases were ascertained from participants' general practitioners, information extracted from hospital medical records by study nurses, or data from the NHS HES database obtained after linking the

participants' unique NHS identification numbers to this national database. Self-reported stroke cases without clinical verification were excluded.

*3. A composite of non-fatal CVD cases including the above two groups*

## References

- 1 Fried LP, Tangen CM, Walston J, Newman AB, Hirsch C, Gottdiener J et al. Frailty in older adults: evidence for a phenotype. *J Gerontol A Biol Sci Med Sci* 2001;56:M146-M156.
- 2 Radloff LS. The CES-D Scale. *Applied Psychological Measurement* 1977;1:385-401.
- 3 Singh-Manoux A, Hillsdon M, Brunner E, Marmot M. Effects of physical activity on cognitive functioning in middle age: evidence from the Whitehall II prospective cohort study. *Am J Public Health* 2005;95:2252-2258.
- 4 Ainsworth BE, Haskell WL, Leon AS, Jacobs DR, Jr., Montoye HJ, Sallis JF et al. Compendium of physical activities: classification of energy costs of human physical activities. *Med Sci Sports Exerc* 1993;25:71-80.
- 5 Boyd CM, Xue QL, Simpson CF, Guralnik JM, Fried LP. Frailty, hospitalization, and progression of disability in a cohort of disabled older women. *Am J Med* 2005;118:1225-1231.
- 6 World Health Organization, Division of Health Situation and Trend Assessment. International classification of diseases translator ninth and tenth revisions : user's guide to electronic tables. Geneva: World Health Organization; 1997.
- 7 The NHS Information Centre for health and social care. Hospital Episode Statistics (HES) online. <http://www.hesonline.nhs.uk> (accessed 25 Jan 2011).

Table S1. Association between CVD risk factors mutually adjusted for CVD risk scores and frailty

| CVD risk scores                | Odds ratio for frailty<br>(95% CI) |
|--------------------------------|------------------------------------|
| <b>Framingham CVD score</b>    |                                    |
| Unadjusted                     | 1.42 (1.23, 1.62)                  |
| Adjusted for                   |                                    |
| Age                            | 1.24 (1.04, 1.48)                  |
| Total cholesterol              | 1.46 (1.26, 1.69)                  |
| HDL cholesterol                | 1.47 (1.27, 1.70)                  |
| Systolic blood pressure        | 1.53 (1.30, 1.80)                  |
| Antihypertensive treatment     | 1.33 (1.14, 1.55)                  |
| Smoking                        | 1.40 (1.22, 1.62)                  |
| Diabetes                       | 1.45 (1.24, 1.70)                  |
| <b>Framingham CHD score</b>    |                                    |
| Unadjusted                     | 1.38 (1.20, 1.59)                  |
| Adjusted for                   |                                    |
| Age                            | 1.22 (1.03, 1.44)                  |
| Total cholesterol              | 1.42 (1.22, 1.65)                  |
| HDL cholesterol                | 1.46 (1.26, 1.71)                  |
| Systolic blood pressure        | 1.43 (1.22, 1.67)                  |
| Diastolic blood pressure       | 1.41 (1.21, 1.63)                  |
| Smoking                        | 1.37 (1.18, 1.59)                  |
| Diabetes                       | 1.38 (1.18, 1.61)                  |
| <b>Framingham stroke score</b> |                                    |
| Unadjusted                     | 1.35 (1.21, 1.51)                  |
| Adjusted for                   |                                    |
| Age                            | 1.23 (1.07, 1.41)                  |
| Systolic blood pressure        | 1.45 (1.26, 1.67)                  |
| Antihypertensive treatment     | 1.28 (1.13, 1.45)                  |
| Smoking                        | 1.34 (1.20, 1.51)                  |
| Diabetes                       | 1.35 (1.19, 1.52)                  |
| Atrial fibrillation            | -                                  |
| Left ventricular hypertrophy   | 1.43 (1.23, 1.67)                  |
| <b>SCORE</b>                   |                                    |
| Unadjusted                     | 1.36 (1.18, 1.56)                  |
| Adjusted for                   |                                    |
| Age                            | 1.12 (0.89, 1.39)                  |
| Total cholesterol              | 1.43 (1.22, 1.67)                  |

|                         |                   |
|-------------------------|-------------------|
| Systolic blood pressure | 1.45 (1.22, 1.73) |
| Smoking                 | 1.34 (1.17, 1.55) |

---

Table S2. Comparison of characteristics between included participants in the present analysis with not included participants but eligible at baseline (phase 5) and alive at the end of follow-up (phase 9), N=7412.

|                                            | Study participants<br>N=3895 |               | Not included participants<br>N=3517 |               | P-value* |
|--------------------------------------------|------------------------------|---------------|-------------------------------------|---------------|----------|
|                                            | N                            | % / Mean (SD) | N                                   | % / Mean (SD) |          |
| Age in years                               | 3895                         | 55.2 (5.9)    | 3517                                | 56.3 (6.0)    | <0.0001  |
| Sex                                        |                              |               |                                     |               |          |
| Men                                        | 2858                         | 73.4          | 2302                                | 65.5          | <0.0001  |
| Women                                      | 1037                         | 26.6          | 1215                                | 34.5          |          |
| Ethnicity                                  |                              |               |                                     |               |          |
| White                                      | 3647                         | 93.6          | 3129                                | 89.0          | <0.0001  |
| Non-White                                  | 248                          | 6.4           | 388                                 | 11.0          |          |
| Employment status                          |                              |               |                                     |               |          |
| Administrative                             | 1812                         | 46.5          | 1279                                | 36.3          | <0.0001  |
| Professional/executive                     | 1695                         | 43.5          | 1536                                | 43.7          |          |
| Clerical/support                           | 388                          | 10.0          | 702                                 | 20.0          |          |
| Total cholesterol, mmol/L, mean (SD)       | 3895                         | 5.92 (1.05)   | 2245                                | 5.97 (1.08)   | 0.09     |
| HDL cholesterol, mmol/L, mean (SD)         | 3895                         | 1.46 (0.39)   | 1564                                | 1.45 (0.40)   | 0.38     |
| Systolic blood pressure, mm Hg, mean (SD)  | 3895                         | 122.7 (16.0)  | 2306                                | 123.3 (17.0)  | 0.17     |
| Diastolic blood pressure, mm Hg, mean (SD) | 3895                         | 77.6 (10.3)   | 2306                                | 77.4 (10.7)   | 0.44     |
| Antihypertensive treatment, n (%)          |                              |               |                                     |               |          |
| No                                         | 3515                         | 90.2          | 2873                                | 83.3          | <0.0001  |
| Yes                                        | 380                          | 9.8           | 578                                 | 16.7          |          |
| Missing                                    | -                            | -             | 66                                  | -             |          |
| Smoking, n (%)                             |                              |               |                                     |               |          |
| No                                         | 3593                         | 92.3          | 2560                                | 87.2          | <0.0001  |
| Yes                                        | 302                          | 7.7           | 377                                 | 12.8          |          |
| Missing                                    | -                            | -             | 580                                 | -             |          |
| Diabetes, n (%)                            |                              |               |                                     |               |          |
| No                                         | 3755                         | 96.4          | 1936                                | 90.1          | <0.0001  |
| Yes                                        | 140                          | 3.6           | 214                                 | 9.9           |          |
| Missing                                    | -                            | -             | 1367                                | -             |          |
| Atrial fibrillation, n (%)                 |                              |               |                                     |               |          |
| No                                         | 3882                         | 99.7          | 2284                                | 99.4          | 0.18     |
| Yes                                        | 13                           | 0.3           | 13                                  | 0.6           |          |
| Missing                                    | -                            | -             | 1220                                | -             |          |
| Left ventricular hypertrophy, n (%)        |                              |               |                                     |               |          |

|         |      |       |      |      |      |
|---------|------|-------|------|------|------|
| No      | 3667 | 94.10 | 2154 | 93.8 | 0.60 |
| Yes     | 228  | 5.90  | 143  | 6.2  |      |
| Missing | -    | -     | 1220 | -    |      |

\* P for heterogeneity

Table S3. Sensitivity analyses: odds ratios (95% CIs) per one sex-specific standard deviation increment in score using four CVD risk algorithms for future frailty after excluding incident CVD

|                              | <b>Non-missing<br/>sample</b> | <b>Sensitivity<br/>analysis 1</b>                 | <b>Sensitivity<br/>analysis 2</b> |
|------------------------------|-------------------------------|---------------------------------------------------|-----------------------------------|
| CVD risk scores              | Study sample:<br>n=3895       | Study sample<br>excluding incident<br>CVD: n=3552 | Multiple<br>imputation:<br>n=7412 |
| Framingham CVD risk score    | 1.42 (1.23, 1.62)             | 1.37 (1.17, 1.61)                                 | 1.43 (1.28, 1.59)                 |
| Framingham CHD risk score    | 1.38 (1.20, 1.59)             | 1.32 (1.12, 1.56)                                 | 1.34 (1.20, 1.50)                 |
| Framingham stroke risk score | 1.35 (1.21, 1.51)             | 1.33 (1.17, 1.52)                                 | 1.28 (1.18, 1.39)                 |
| SCORE                        | 1.36 (1.18, 1.56)             | 1.30 (1.10, 1.53)                                 | 1.33 (1.20, 1.47)                 |

Abbreviations: CVD, cardiovascular disease.

Table S4. Odds ratio per one sex-specific standard deviation increment in score using four CVD risk algorithms for future pre-frailty and cardiovascular diseases (n=3787)

|                              | Pre-frailty     |                        | Outcome | CVD             |                        |
|------------------------------|-----------------|------------------------|---------|-----------------|------------------------|
|                              | Number of cases | Odds Ratio<br>(95% CI) |         | Number of cases | Odds ratio<br>(95% CI) |
| Framingham CVD risk score    | 1445            | 1.18 (1.10, 1.26)      | CVD     | 325             | 1.64 (1.49, 1.79)      |
| Framingham CHD risk score    | 1445            | 1.15 (1.08, 1.23)      | CHD     | 298             | 1.52 (1.38, 1.68)      |
| Framingham stroke risk score | 1445            | 1.16 (1.09, 1.24)      | Stroke  | 35              | 1.40 (1.17, 1.68)      |
| SCORE (CVD risk score)       | 1445            | 1.15 (1.08, 1.23)      | CVD     | 325             | 1.55 (1.42, 1.70)      |

Abbreviations: CVD, cardiovascular disease; CHD, coronary heart disease.
